# Supplementary material for: Characterization of Mental Health in US Veterans Before, During, and 2 Years After the Onset of the COVID-19 Pandemic
Source: PubMed Central journal article supplement (PMC9951035; doi:10.1001/jamanetworkopen.2023.0463), 2023-02-23
Supplement: jamanetwopen-e230463-s002.pdf [file jamanetwopen-e230463-s002.pdf]

## Data Sharing Statement

Fischer. Characterization of Mental Health in US Veterans Before, During, and 2 Years After the Onset of the COVID-19 Pandemic. *JAMA Netw Open*. Published February 23, 2023.

doi:10.1001/jamanetworkopen.2023.0463

### Data

**Data available:** No

### Additional Information

**Explanation for why data not available:** Veterans Affairs requests persons interested in data reach out directly.
